# Supplementary material for: Structural modification from centrosymmetric Rb4Hg2Ge2S8 to noncentrosymmetric (Na3Rb)Hg2Ge2S8: mixed alkali metals strategy for infrared nonlinear optical material design
Source: Royal Society of Chemistry journal article supplement (doi:10.1039/d1tc05458a), 2021-12-15
Supplement: d1tc05458a1.pdf [file d1tc05458a1.pdf]

*Supporting Information for*

**Structural Modification from Centrosymmetric  $\text{Rb}_4\text{Hg}_2\text{Ge}_2\text{S}_8$  to  
Noncentrosymmetric  $(\text{Na}_3\text{Rb})\text{Hg}_2\text{Ge}_2\text{S}_8$ : Mixed Alkali-metals Strategy  
for Infrared Nonlinear Optical Material Design**

Chunlan Tang,<sup>[ab]</sup> Wenhao Xing,<sup>[b]</sup> Fei Liang,<sup>[c]</sup> Mengran Sun,<sup>[d]</sup> Jian Tang,<sup>[b]</sup> Zheshuai Lin,<sup>[d]</sup> Jiyong Yao,<sup>[d]</sup> Kainxin Chen,<sup>[a]</sup> Jieyun Wu,<sup>\*[a]</sup> Wenlong Yin,<sup>\*[be]</sup> and Bin Kang<sup>[be]</sup>

<sup>a</sup> School of Optoelectronic Science and Engineering, University of Electronic Science and Technology of China, Chengdu 611731, P.R. China. E-mail: [jieyunwu@uestc.edu.cn](mailto:jieyunwu@uestc.edu.cn)

<sup>b</sup> Institute of Chemical Materials, China Academy of Engineering Physics, Mianyang 621900, P.R. China.

<sup>c</sup> Institute of Materials Science, TU Darmstadt, Darmstadt 64287, Germany. E-mail: [wlyin@caep.cn](mailto:wlyin@caep.cn)

<sup>d</sup> Beijing Center for Crystal Research and Development, Key Lab of Functional Crystals and Laser Technology, Technical Institute of Physics and Chemistry, Chinese Academy of Sciences, Beijing 100190, P.R. China.

<sup>e</sup> Key Laboratory of Science and Technology on High Energy Laser, China Academy of Engineering Physics, Mianyang 621900, P.R. China.

1. Syntheses of  $\text{Rb}_4\text{Hg}_2\text{Ge}_2\text{S}_8$ .
2. Figure S1.
3. Figure S2.
4. Figure S3.
5. Figure S4.
6. Table S1.
7. Table S2.
8. Table S3.
9. Table S4.

## 1. Syntheses of $\text{Rb}_4\text{Hg}_2\text{Ge}_2\text{S}_8$ .

The single crystals of  $\text{Rb}_4\text{Hg}_2\text{Ge}_2\text{S}_8$  were prepared by high-temperature solid-state reaction of  $\text{Na}_2\text{S}$  (78 mg),  $\text{HgS}$  (233 mg),  $\text{GeS}_2$  (137 mg) and  $\text{RbCl}$  (500 mg), which was added as cation exchanger and flux. The mixture was thoroughly ground in an agate mortar and loaded into silica tubes. The silica tubes were sealed with oxy-hydrogen flame under a high vacuum of  $10^{-3}$  Pa, and were then placed in a computer-controlled furnace. The following temperature control program was executed: heating from room temperature to 1073K in 10 hours, kept for 3 days, then cooling slowly to room temperature with a ramp rate of 3 K/h. Greenish transparent block crystals were obtained in approximately 50% yield based on Hg. We tried to synthesize the polycrystalline sample  $\text{Rb}_4\text{Hg}_2\text{Ge}_2\text{S}_8$  by a similar strategy but failed.

2. Figure S1.

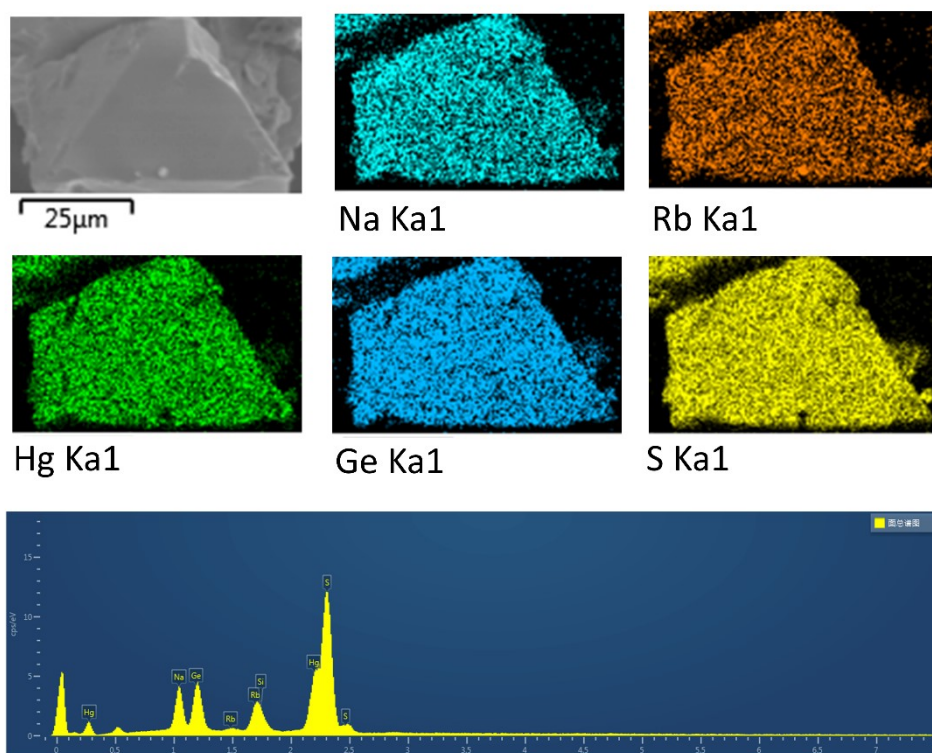

**Figure S1.** The SEM pictures and EDS results of  $(\text{Na}_3\text{Rb})\text{Hg}_2\text{Ge}_2\text{S}_8$ .

3. Figure S2.

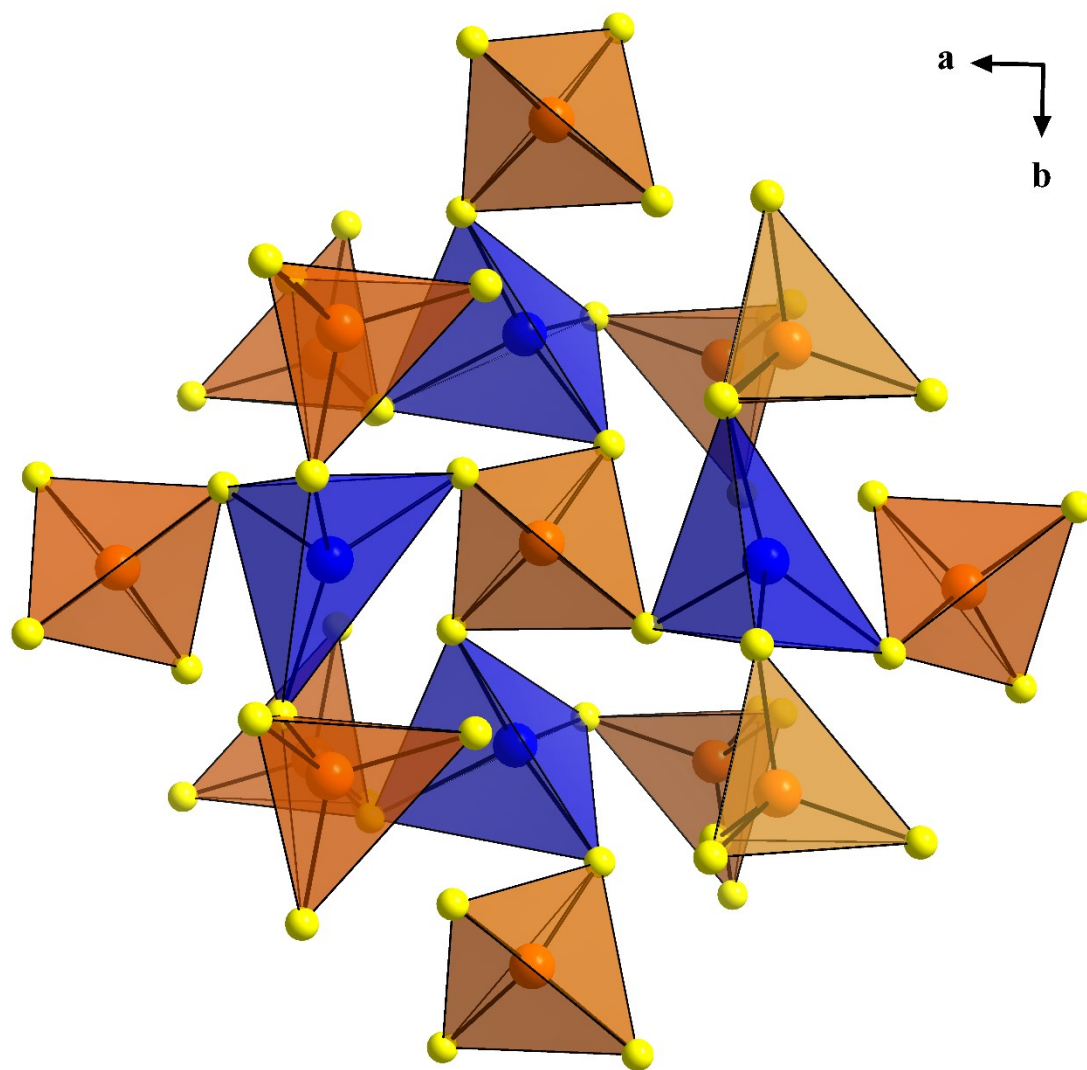

Figure S2. 3D covalent framework structure  $[\text{HgGeS}_4]^{2-}$  of  $(\text{Na}_3\text{Rb})\text{Hg}_2\text{Ge}_2\text{S}_8$ .

4. Figure S3.

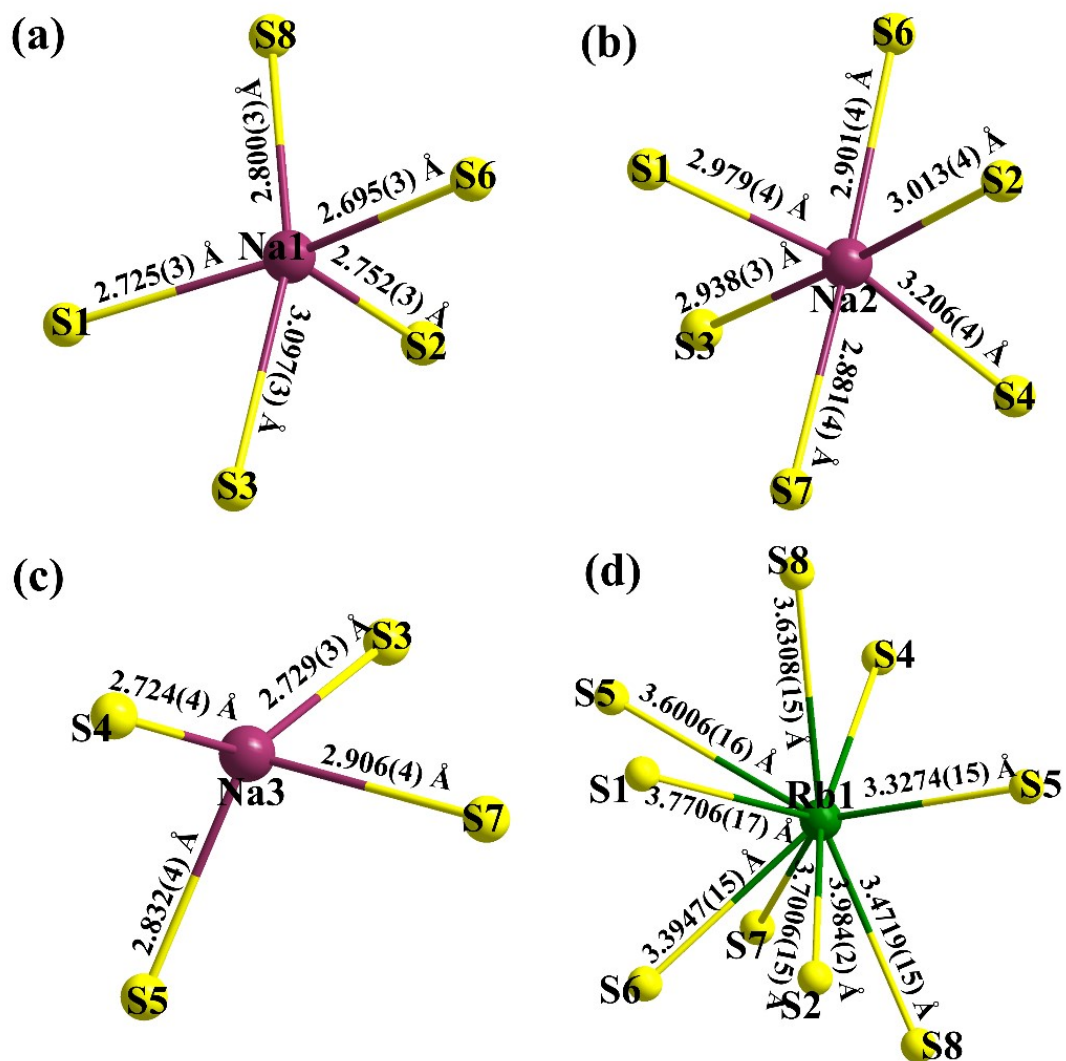

**Figure S3.** (a) the coordination environments of Na1 atoms, (b) Na2 atoms, (c) Na3 atoms and (d) Rb1 atoms in  $(\text{Na}_3\text{Rb})\text{Hg}_2\text{Ge}_2\text{S}_8$ .

5. Figure S4.

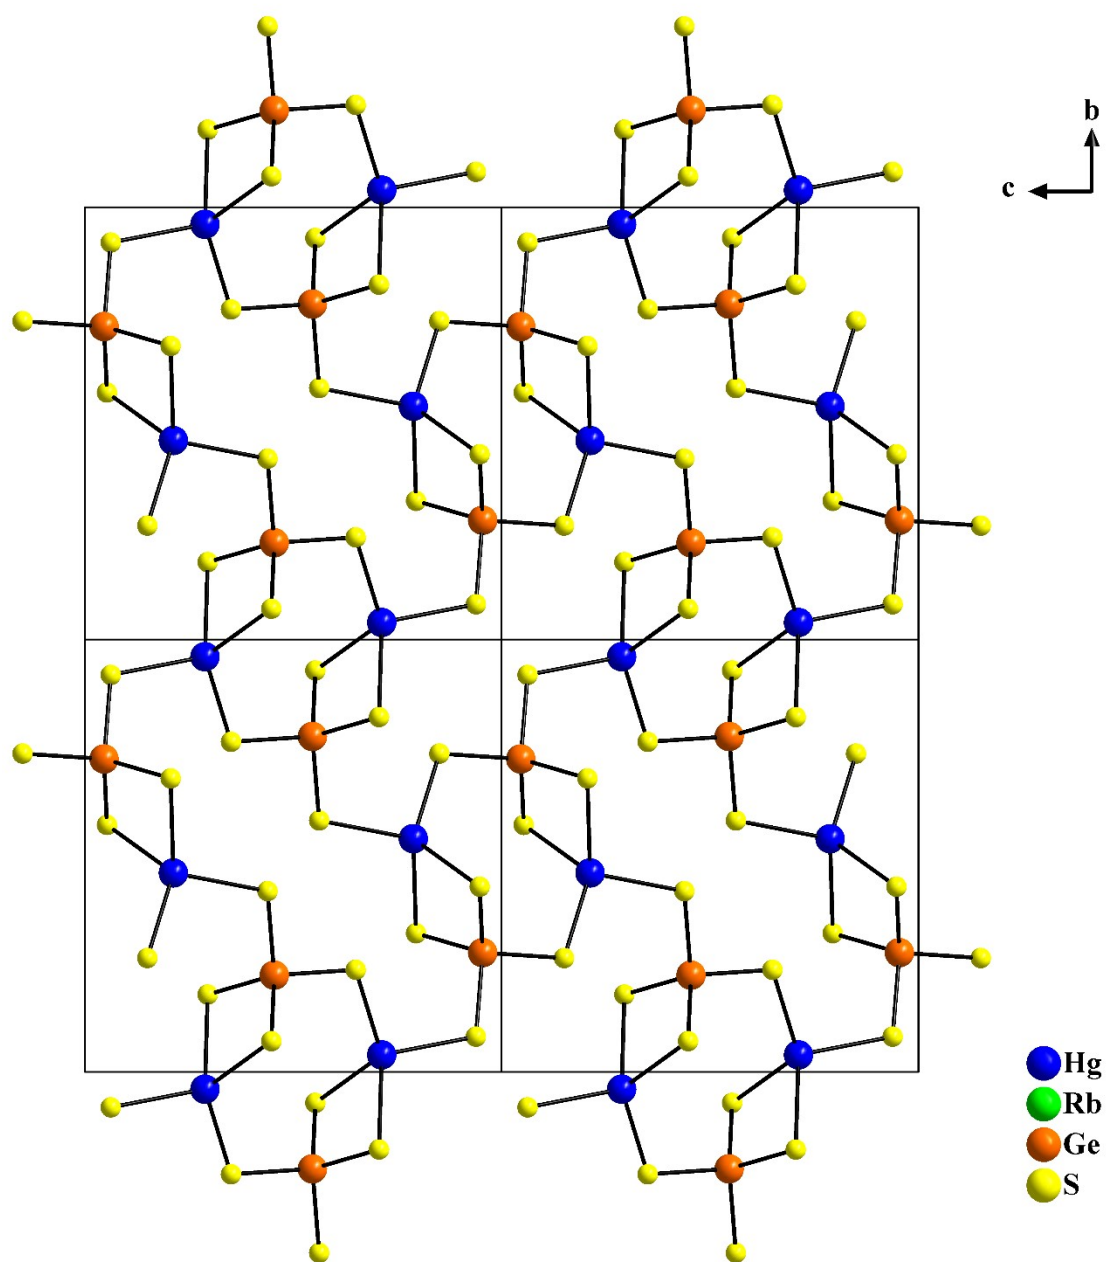

**Figure S4.** 2D layered structure  $\{[\text{HgGeS}_4]^{2-}\}_\infty$  in the  $bc$  plane of  $\text{Rb}_4\text{Hg}_2\text{Ge}_2\text{S}_8$ .

**6. Table S1** Atomic coordinates, equivalent isotropic displacement parameters and bond valence sums (BVS) for  $\text{Rb}_4\text{Hg}_2\text{Ge}_2\text{S}_8$ .

| Atom | Wyckoff position | $x$          | $y$         | $z$         | $U_{\text{eq}} (\text{\AA}^2)^a$ | BVS   |
|------|------------------|--------------|-------------|-------------|----------------------------------|-------|
| Hg1  | 4e               | -0.12548(2)  | 0.95919(2)  | 0.28943(2)  | 0.02627(7)                       | 2.04  |
| Ge1  | 4e               | 0.14265(5)   | 0.77624(4)  | 0.5462(4)   | 0.01402(9)                       | 4.10  |
| Rb1  | 4e               | 0.12779(5)   | 0.48431(4)  | 0.26205(4)  | 0.02614(10)                      | 1.20  |
| Rb2  | 4e               | 0.63657(5)   | 0.72637(4)  | 0.50102(4)  | 0.02795(10)                      | 0.93  |
| S1   | 4e               | 0.02136(13)  | 0.76424(10) | 0.35068(10) | 0.0227(2)                        | -2.11 |
| S2   | 4e               | -0.03318(12) | 0.82081(9)  | 0.7046(10)  | 0.0195(2)                        | -1.97 |
| S3   | 4e               | 0.32719(12)  | 0.92881(9)  | 0.5536(10)  | 0.019(2)                         | -2.12 |
| S4   | 4e               | 0.25032(13)  | 0.58284(9)  | 0.56304(10) | 0.0214(2)                        | -2.05 |

<sup>a</sup>  $U_{\text{eq}}$  is defined as one-third of the trace of the orthogonalized  $U_{ij}$  tensor.

7. **Table S2** Atomic coordinates, equivalent isotropic displacement parameters and bond valence sums (BVS) for (Na<sub>3</sub>Rb)Hg<sub>2</sub>Ge<sub>2</sub>S<sub>8</sub>.

| Atom | Wyckof<br>f<br>position | <i>x</i>    | <i>y</i>    | <i>z</i>    | $U_{eq}$ (Å <sup>2</sup> ) <sup>a</sup> | BVS   |
|------|-------------------------|-------------|-------------|-------------|-----------------------------------------|-------|
| Hg1  | 4a                      | 0.22816(2)  | 0.95221(4)  | 0.49736(2)  | 0.02681(7)                              | 2.15  |
| Hg2  | 4a                      | 0.48729(2)  | 0.50932(4)  | 0.73545(2)  | 0.02708(7)                              | 2.15  |
| Ge1  | 4a                      | 0.25481(6)  | 0.46081(10) | 0.36626(3)  | 0.01228(13)                             | 4.16  |
| Ge2  | 4a                      | 0.47576(5)  | 0.99170(8)  | 0.61673(3)  | 0.01205(13)                             | 4.04  |
| Na1  | 4a                      | 0.47381(18) | 0.5037(4)   | 0.47367(18) | 0.0297(7)                               | 1.26  |
| Na2  | 4a                      | 0.5100(3)   | 0.9965(5)   | 0.37045(19) | 0.0379(9)                               | 0.92  |
| Na3  | 4a                      | 0.3671(3)   | −0.0475(5)  | 0.2613(2)   | 0.0472(10)                              | 1.01  |
| Rb1  | 4a                      | 0.23051(5)  | 0.4120(11)  | 0.61936(4)  | 0.03025(16)                             | 0.91  |
| S1   | 4a                      | 0.33262(11) | 0.2228(2)   | 0.4316(8)   | 0.0246(3)                               | −2.06 |
| S2   | 4a                      | 0.15076(11) | 0.6722(2)   | 0.4235(10)  | 0.0312(4)                               | −2.09 |
| S3   | 4a                      | 0.38022(10) | 0.6532(2)   | 0.32619(8)  | 0.0215(3)                               | −2.05 |
| S4   | 4a                      | 0.16107(11) | 0.3035(2)   | 0.28389(8)  | 0.0242(3)                               | −2.13 |
| S5   | 4a                      | 0.31459(9)  | 0.8900(2)   | 0.61824(8)  | 0.0209(3)                               | −2.08 |
| S6   | 4a                      | 0.5533(10)  | 0.8602(2)   | 0.51982(7)  | 0.0174(3)                               | −2.11 |
| S7   | 4a                      | 0.53783(10) | 0.8685(2)   | 0.7229(7)   | 0.0196(3)                               | −2.06 |
| S8   | 4a                      | 0.5027(11)  | 1.32109(19) | 0.61202(8)  | 0.0206(3)                               | −2.03 |

<sup>a</sup>  $U_{eq}$  is defined as one-third of the trace of the orthogonalized  $U_{ij}$  tensor.



**8. Table S3** Selected bond distances (Å) and bond angles (°) for Rb<sub>4</sub>Hg<sub>2</sub>Ge<sub>2</sub>S<sub>8</sub>.

|                                      |            |                      |            |
|--------------------------------------|------------|----------------------|------------|
| Hg1–S1                               | 2.4609(10) | Rb1–S3 <sup>2</sup>  | 3.3600(11) |
| Hg1–S2 <sup>5</sup>                  | 2.6601(10) | Rb1–S3 <sup>12</sup> | 3.2944(11) |
| Hg1–S3 <sup>5</sup>                  | 2.5835(10) | Rb1–S4               | 3.3878(11) |
| Hg1–S4 <sup>2</sup>                  | 2.5551(10) | Rb1–S4 <sup>6</sup>  | 3.6298(12) |
| Ge1–S1                               | 2.2245(11) | Rb2–S1 <sup>7</sup>  | 3.6924(11) |
| Ge1–S2                               | 2.2122(10) | Rb2–S1 <sup>10</sup> | 3.5116(12) |
| Ge1–S3                               | 2.2036(10) | Rb2–S2 <sup>10</sup> | 3.5307(11) |
| Ge1–S4                               | 2.2304(10) | Rb2–S2 <sup>11</sup> | 3.3554(11) |
| Rb1–S1                               | 3.2141(11) | Rb2–S3               | 3.3468(10) |
| Rb1–S1 <sup>12</sup>                 | 3.8591(12) | Rb2–S3 <sup>9</sup>  | 3.6997(11) |
| Rb1–S2 <sup>6</sup>                  | 3.3338(11) | Rb2–S4               | 3.5459(12) |
| Rb1–S2 <sup>11</sup>                 | 3.4920(11) | Rb2–S4 <sup>8</sup>  | 3.4588(11) |
| <hr/>                                |            |                      |            |
| S3 <sup>5</sup> —Hg1—S2 <sup>5</sup> | 83.91(3)   | S3—Ge1—S2            | 105.11(4)  |
| S4 <sup>2</sup> —Hg1—S3 <sup>5</sup> | 112.98(3)  | S3—Ge1—S4            | 113.68(4)  |
| S4 <sup>2</sup> —Hg1—S2 <sup>5</sup> | 111.25(3)  | S3—Ge1—S1            | 111.80(4)  |
| S1—Hg1—S3 <sup>5</sup>               | 122.33(3)  | S2—Ge1—S4            | 113.17(4)  |
| S1—Hg1—S2 <sup>5</sup>               | 119.47(3)  | S2—Ge1—S1            | 112.44(4)  |
| S1—Hg1—S4 <sup>2</sup>               | 105.85(3)  | S1—Ge1—S4            | 100.90(4)  |

Symmetry codes: (1)-1+X, +Y, +Z; (2)-1/2+X, 3/2-Y, -1/2+Z; (3)1/2-X, 1/2+Y, 1/2-Z; (4)-1/2-X, 1/2+Y, 1/2-Z; (5)-X, 2-Y, 1-Z; (6)-X, 1-Y, 1-Z; (7)1+X, +Y, +Z; (8)1/2+X, 3/2-Y, 1/2+Z; (9)1-X, 1-Y, 1-Z; (10)1-X, 2-Y, 1-Z; (11)1/2+X, 3/2-Y, -1/2+Z; (12)1/2-X, -1/2+Y, 1/2-Z; (13)-1/2+X, 3/2-Y, 1/2+Z.

**9. Table S4** Selected band distances (Å) and band angles (°) for (Na<sub>3</sub>Rb)Hg<sub>2</sub>Ge<sub>2</sub>S<sub>8</sub>.

|                                      |            |                      |            |
|--------------------------------------|------------|----------------------|------------|
| Hg1–S1 <sup>5</sup>                  | 2.5410(14) | Na1 <sup>5</sup> –S8 | 2.800(3)   |
| Hg1–S2                               | 2.4896(15) | Na2 <sup>2</sup> –S1 | 2.979(4)   |
| Hg1–S5                               | 2.4973(14) | Na2 <sup>6</sup> –S2 | 3.013(4)   |
| Hg1–S6 <sup>6</sup>                  | 2.6408(13) | Na2–S3               | 2.938(3)   |
| Hg2–S3 <sup>3</sup>                  | 2.6207(14) | Na2 <sup>7</sup> –S4 | 3.206(4)   |
| Hg2–S4 <sup>4</sup>                  | 2.5304(14) | Na2–S6               | 2.901(4)   |
| Hg2–S7                               | 2.4595(13) | Na2 <sup>8</sup> –S7 | 2.881(4)   |
| Hg2–S8 <sup>2</sup>                  | 2.5588(13) | Na3 <sup>5</sup> –S3 | 2.729(3)   |
| Ge1–S1                               | 2.2097(15) | Na3–S4               | 2.724(4)   |
| Ge1–S2                               | 2.2067(15) | Na3 <sup>9</sup> –S5 | 2.832(4)   |
| Ge1–S3                               | 2.2005(15) | Na3 <sup>3</sup> –S7 | 2.906(4)   |
| Ge1–S4                               | 2.1921(15) | Rb1–S1               | 3.7706(17) |
| Ge2–S5                               | 2.2232(14) | Rb1–S2               | 3.984(2)   |
| Ge2–S6                               | 2.2037(14) | Rb1–S4 <sup>4</sup>  | 3.4614(17) |
| Ge2–S7                               | 2.2372(14) | Rb1–S5 <sup>2</sup>  | 3.6006(16) |
| Ge2–S8                               | 2.1923(14) | Rb1–S5               | 3.3274(15) |
| Na1–S1                               | 2.725(3)   | Rb1–S6 <sup>7</sup>  | 3.3947(15) |
| Na1 <sup>7</sup> –S2                 | 2.752(3)   | Rb1–S7 <sup>7</sup>  | 3.7006(15) |
| Na1–S3                               | 3.097(3)   | Rb1–S8 <sup>2</sup>  | 3.6308(15) |
| Na1–S6                               | 2.695(3)   | Rb1–S8 <sup>6</sup>  | 3.4719(15) |
|                                      |            |                      |            |
| S5—Hg1—S6 <sup>6</sup>               | 109.78(4)  | S3—Ge1—S1            | 103.55(6)  |
| S5—Hg1—S1 <sup>5</sup>               | 106.11(4)  | S3—Ge1—S2            | 105.00(6)  |
| S1 <sup>5</sup> —Hg1—S6 <sup>6</sup> | 102.55(4)  | S4—Ge1—S3            | 117.95(6)  |
| S2—Hg1—S6 <sup>6</sup>               | 94.03(5)   | S4—Ge1—S1            | 106.91(6)  |
| S2—Hg1—S5                            | 122.35(5)  | S4—Ge1—S2            | 105.41(6)  |
| S2—Hg1—S1 <sup>5</sup>               | 119.09(6)  | S2—Ge1—S1            | 118.75(7)  |
| S7—Hg2—S8 <sup>2</sup>               | 111.15(4)  | S6—Ge2—S7            | 111.81(5)  |
| S7—Hg2—S3 <sup>3</sup>               | 105.55(4)  | S6—Ge2—S5            | 109.50(6)  |
| S7—Hg2—S4 <sup>4</sup>               | 138.78(5)  | S5—Ge2—S7            | 103.25(6)  |
| S8 <sup>2</sup> —Hg2—S3 <sup>3</sup> | 107.26(4)  | S8—Ge2—S7            | 109.32(6)  |
| S4 <sup>4</sup> —Hg2—S8 <sup>2</sup> | 96.04(4)   | S8—Ge2—S6            | 106.29(6)  |
| S4 <sup>4</sup> —Hg2—S3 <sup>3</sup> | 94.54(5)   | S8—Ge2—S5            | 116.79(6)  |

Symmetry codes: (1)  $-1/2+X, 1-Y, +Z$ ; (2)  $+X, 1+Y, +Z$ ; (3)  $1-X, 1-Y, 1/2+Z$ ; (4)  $3/2-X, +Y, 1/2+Z$ ; (5)  $+X, -1+Y, +Z$ ; (6)  $1/2+X, -Y, +Z$ ; (7)  $1/2+X, 1-Y, +Z$ ; (8)  $1-X, -Y, 1/2+Z$ ; (9)  $-1/2+X, -Y, +Z$ ; (10)  $3/2-X, -1+Y, 1/2+Z$ ; (11)  $1-X, 1-Y, -1/2+Z$ ; (12)  $3/2-X, +Y, -1/2+Z$ ; (13)  $3/2-X, 1+Y, -1/2+Z$ ; (14)  $1-X, -Y, -1/2+Z$ .
